# Supplementary material for: Tin dioxide as a high-performance catalyst towards Ce(vi)/Ce(iii) redox reactions for redox flow battery applications
Source: Royal Society of Chemistry journal article supplement (doi:10.1039/c6ta09274h), 2017-01-01
Supplement: c6ta09274h1.pdf [file c6ta09274h1.pdf]

## Electronic Supplementary Information (ESI)

### Tin Dioxide as a High-Performance Catalyst towards Ce(VI)/Ce(III) Redox Reaction for Redox Flow Battery Applications

Zhaolin Na<sup>a,b</sup>, Xuxu Wang<sup>a,b</sup>, Dongming Yin<sup>a,b</sup>, Limin Wang<sup>a,c,\*</sup>

<sup>a</sup> State Key Laboratory of Rare Earth Resource Utilization, Changchun Institute of Applied Chemistry, CAS, Changchun, 130022, China

<sup>b</sup> Changzhou Institute of Energy Storage Materials and Devices, Changzhou 213000, China

<sup>c</sup> University of Chinese Academy of Sciences, Beijing 100049, China

**\*Corresponding author:** Limin Wang, Email: [lmwang@ciac.ac.cn](mailto:lmwang@ciac.ac.cn), Tel: +86-431-85262447, Fax: +86-431-85262836.

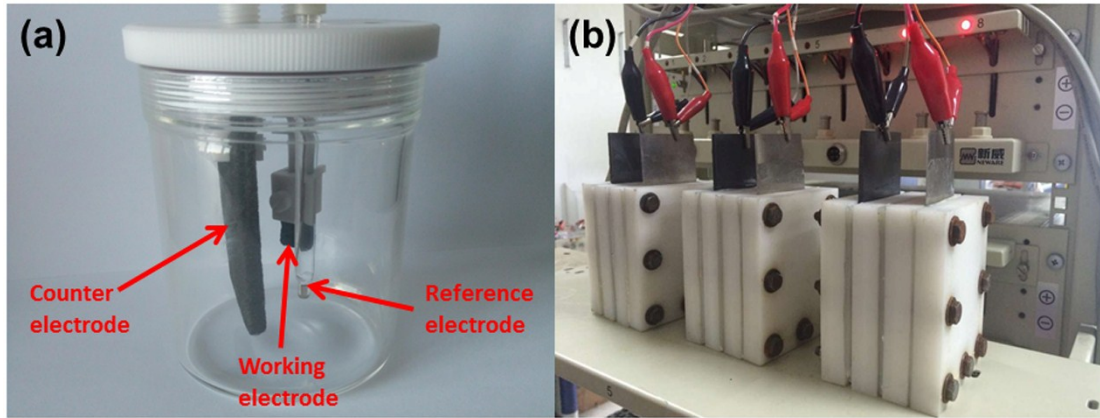

**Fig. S1.** Digital photograph of (a) the three-electrode electrochemical cell and (b) the actual test rig being tested.

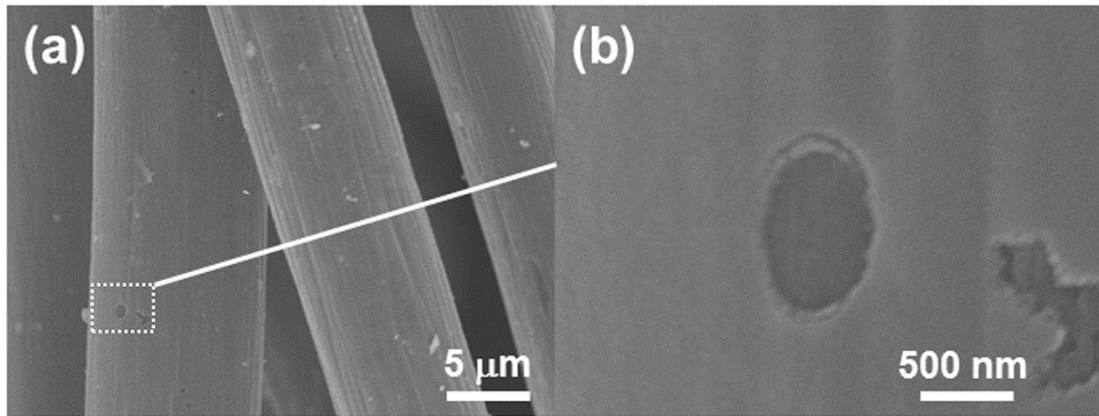

**Fig. S2.** SEM images of the GFSN electrodes.

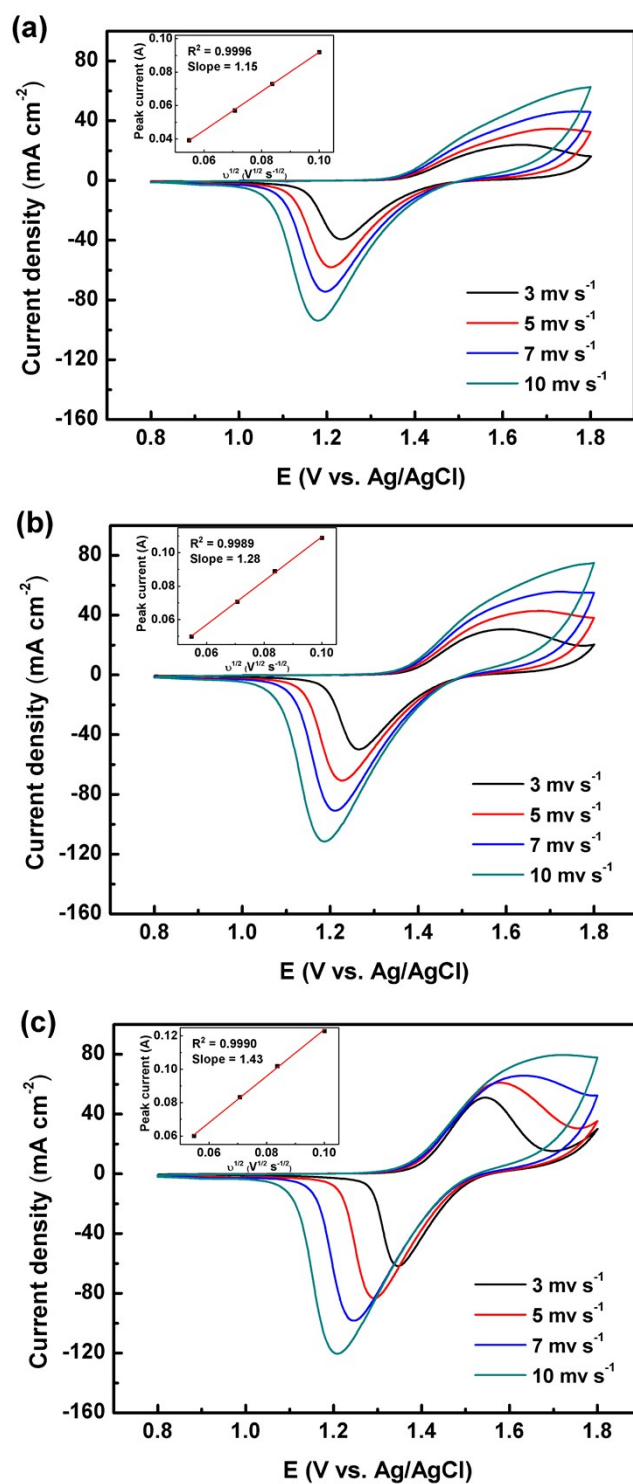

**Fig. S3.** CV curves of the (a) GF, (b) AGF and (c) GFSN electrodes in 0.05 M Ce(III) methanesulfonate + 1.0 M MSA electrolyte from 0.8 V and 1.8 V vs. Ag/AgCl under various scan rate. Insets: the plot of the peak current vs. the square root of each scan rate.

## S1. The electrochemical surface area (ECSA)

The electrochemical surface area (ECSA) that is available for the electron transfer to/from the species contained in solution can be estimated from the Randles-Sevcik equation. This equation relates the peak current with the square root of the scan rate, as follows:

$$i_p = 2.99 \times 10^5 n (\alpha n)^{1/2} A D_0^{1/2} C_0 \nu^{1/2}$$

where  $i_p$  is the peak current,  $n$  is the number of electrons participating in the reaction,  $\alpha$  is the transfer coefficient (0.5),  $A$  is the ECSA ( $\text{cm}^2$ ),  $C_0$  is the initial concentration of the electroactive species ( $\text{mol cm}^{-3}$ ),  $D_0$  is the diffusion coefficient ( $\text{cm}^2 \text{s}^{-1}$ ) and  $\nu$  is the scan rate ( $\text{V s}^{-1}$ ). The values of the diffusion coefficients were obtained from bibliography (S1),

$0.69 \times 10^{-6} \text{ cm}^2 \text{ s}^{-1}$ .

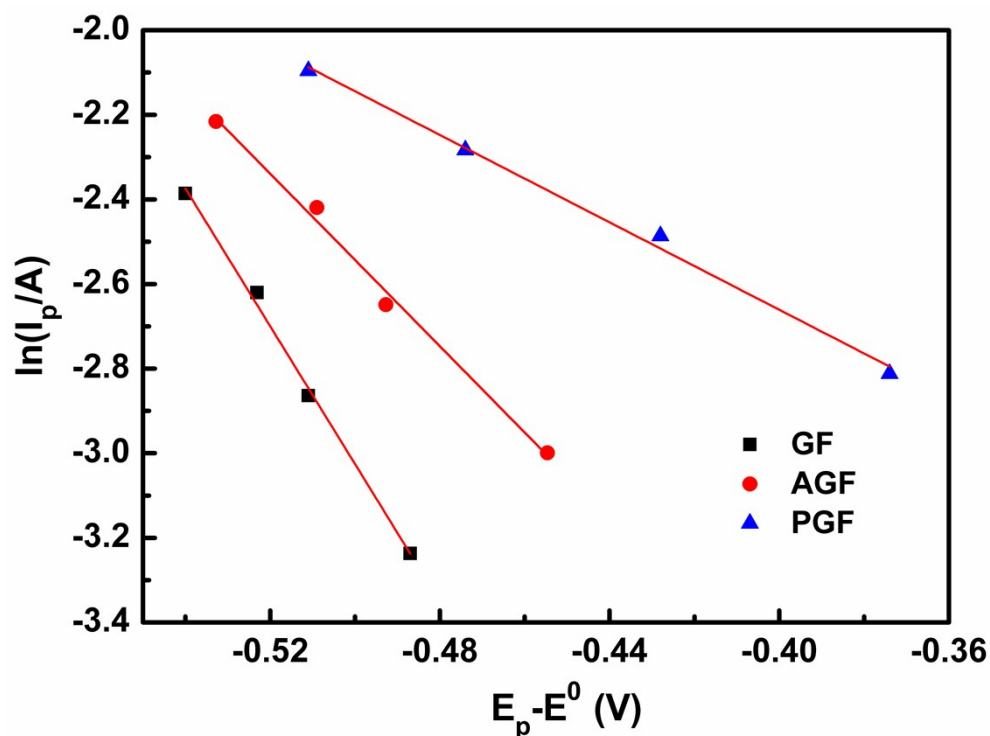

**Fig. S4.** Comparison of standard rate constant ( $k$ ) for GF, AGF and PGF.

## S2. The standard rate constant, $k_0$

The peak current in the CV curves (Fig. S3) can be described by the following equation for a totally irreversible reaction:

$$i_p = 0.227nFAC_0k_0 \exp\left[\frac{-\alpha nF(E_p - E^0)}{RT}\right]$$

where  $i_p$  is the peak current,  $n$  is the number of electrons participating in the reaction,  $F$  is the Faraday constant,  $A$  is the active surface area of the electrode,  $C_0$  is the initial concentration of the electroactive species,  $\alpha$  is the transfer coefficient (0.5),  $E_p$  is the peak potential,  $E^0$  is the standard electrode potential,  $R$  is the gas constant, and  $T$  is the temperature.

According to this equation, a plot of  $\ln(i_p)$  vs.  $E_p - E^0$ , should yield a straight line with a slope of  $-\alpha nF/(RT)$ , and an intercept proportional to  $k_0$ , from which  $k_0$  values can be calculated (Fig. S4).

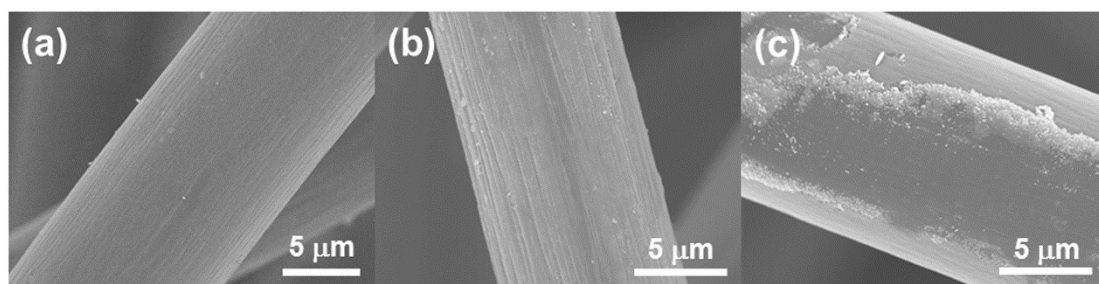

**Fig. S5.** SEM images of various GFSN samples with with different heat treatment temperatures (a) 500 °C, (b) 600 °C and (C) 700 °C.

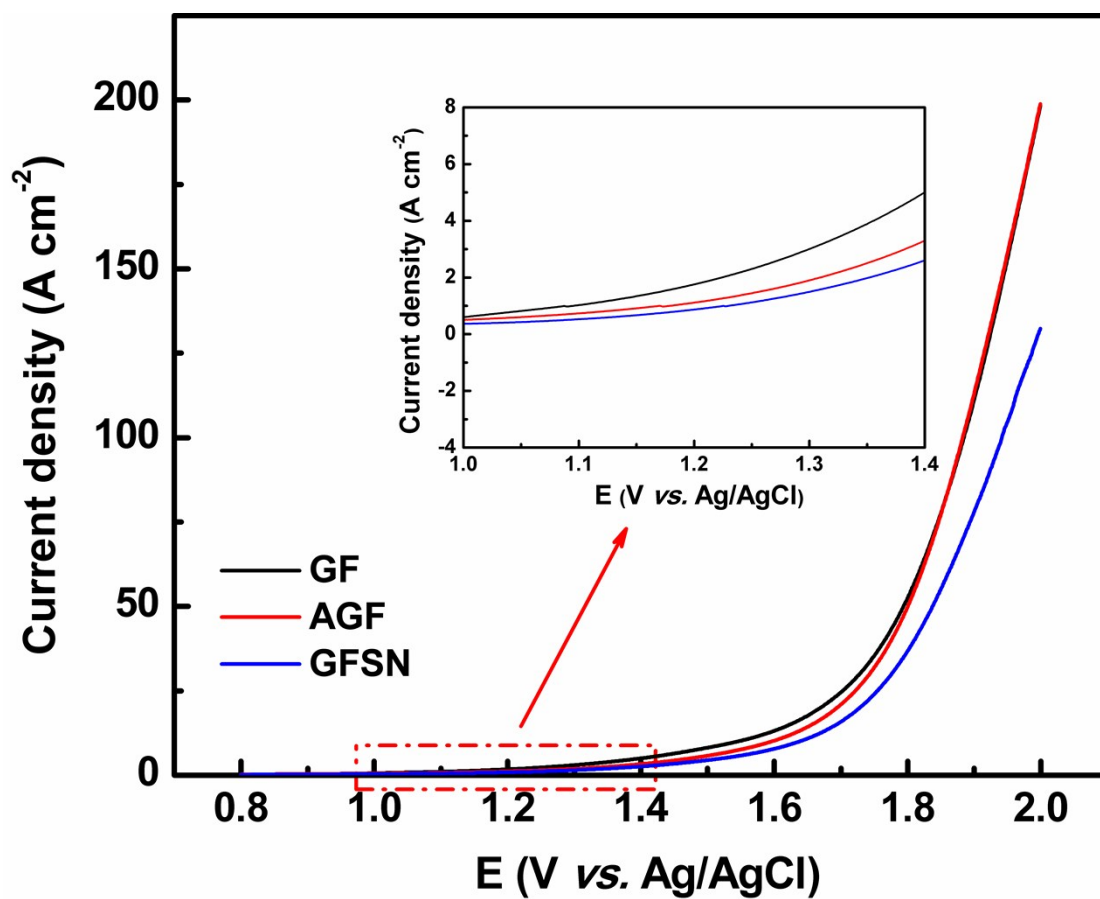

**Fig. S6.** LSVs performed in the electrolytes of 1.0 M MSA without cerium salts from 0.8 V and 2.0 V at  $10\ mV\ s^{-1}$ .



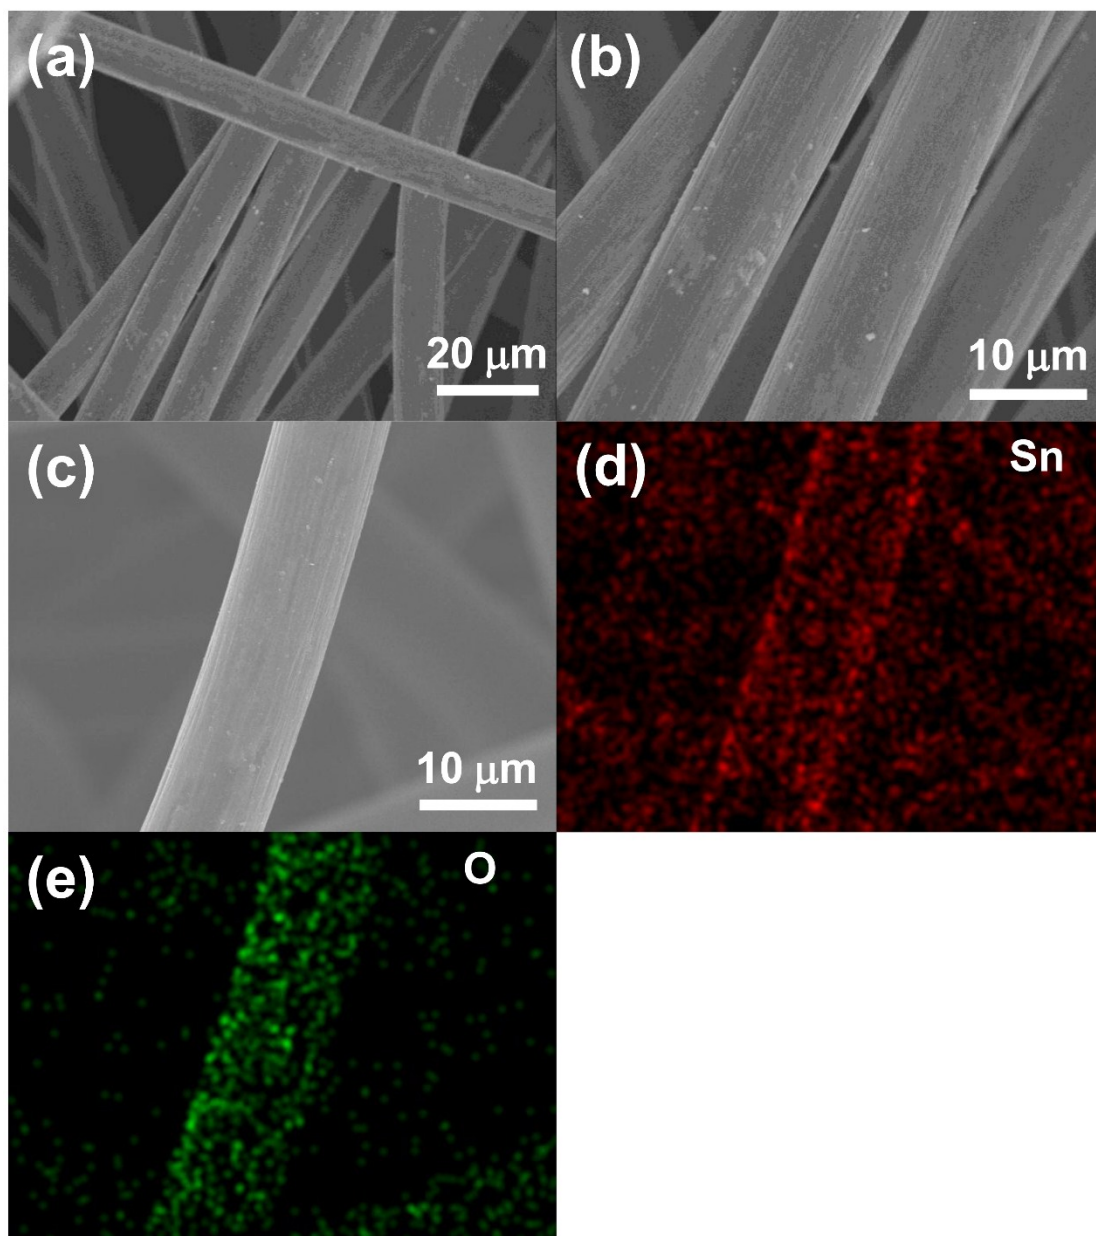

**Fig. S7.** (a)-(b) SEM images and (c)-(e) corresponding EDS mapping of the SnO<sub>2</sub> catalyst coated graphite felt electrode after 100 charge/discharge cycles.

## Supplementary Reference

- (S1) P. K. Leung, C. Ponce de Le' on, C. T. J. Low and F. C. Walsh,  
*Electrochim. Acta*, 2011, **56**, 2145–2153.
